# Supplementary material for: Molecular mechanism of IKK catalytic dimer docking to NF-κB substrates
Source: PubMed Central journal article supplement — Nat Commun. 2024 Sep 3;15:7692. doi: 10.1038/s41467-024-52076-0 (PMC11371828; doi:10.1038/s41467-024-52076-0), 2024-09-03

## **Molecular mechanism of IKK catalytic dimer docking to NF- $\kappa$ B substrates**

Changqing Li<sup>#1</sup>, Stefano Moro<sup>#1</sup>, Kateryna Shostak<sup>2</sup>, Francis J. O'Reilly<sup>3</sup>, Mariel Donzeau<sup>1</sup>, Andrea Graziadei<sup>3</sup>, Alastair G. McEwen<sup>4</sup>, Dominique Desplancq<sup>1</sup>, Pierre Poussin-Courmontagne<sup>4</sup>, Thomas Bachelart<sup>1</sup>, Mert Fiskin<sup>1</sup>, Nicolas Berrodier<sup>4</sup>, Simon Pichard<sup>4</sup>, Karl Brillet<sup>5</sup>, Georges Orfanoudakis<sup>1</sup>, Arnaud Poterszman<sup>4</sup>, Vladimir Torbeev<sup>1</sup>, Juri Rappsilber<sup>3</sup>, Norman E. Davey<sup>6</sup>, Alain Chariot<sup>2,7</sup> and Katia Zanier<sup>1\*</sup>

### **Supplementary Information:**

#### **Supplementary Figures 1 to 12**

#### **Supplementary Table 1**

#### **Original gel images for Supplementary Figures**

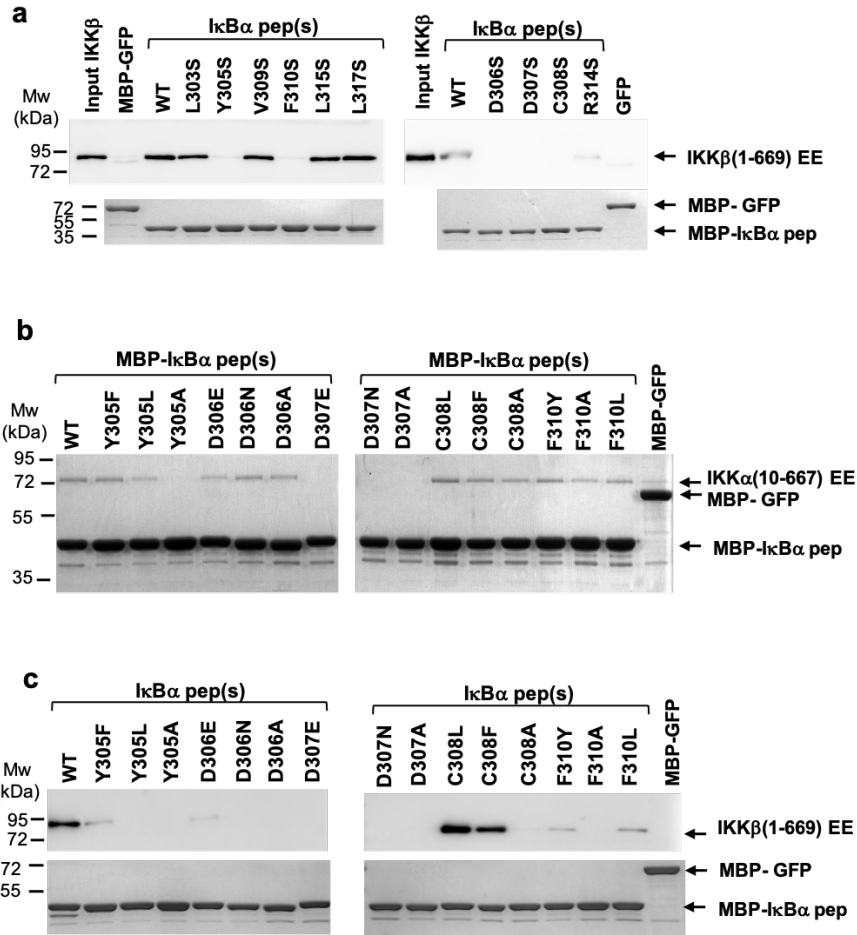

**Supplementary Fig. 1.** Pull-down analyses of MBP-I $\kappa$ B $\alpha$  pep(s) mutants. **a** Interactions of the 6xHis-IKK $\beta$ (1-669) EE with MBP-I $\kappa$ B $\alpha$  pep(s) constructs bearing the indicated serine substitutions. These results were confirmed with a second independent pull-down experiment. **b-c** Representative images of the pull-down experiments on the interactions between 6xHis-IKK $\alpha$ (10-667) EE or 6xHis-IKK $\beta$ (1-669) EE homodimer samples and MBP-I $\kappa$ B $\alpha$  pep(s) constructs containing single amino acid substitutions at the conserved position of the YDD $\Phi$ x $\Phi$  consensus. See also Fig. 1e of main text for quantifications. **a-c** All pull-down samples were migrated on a 10% SDS-PAGE gel. 6xHis-IKK $\beta$ (1-669) EE was detected by Western blotting (anti-His antibody), whereas 6xHis-IKK $\alpha$ (10-669) EE and MBP-I $\kappa$ B $\alpha$  pep constructs were detected by Coomassie staining. Original uncropped images are provided at the end of this file.

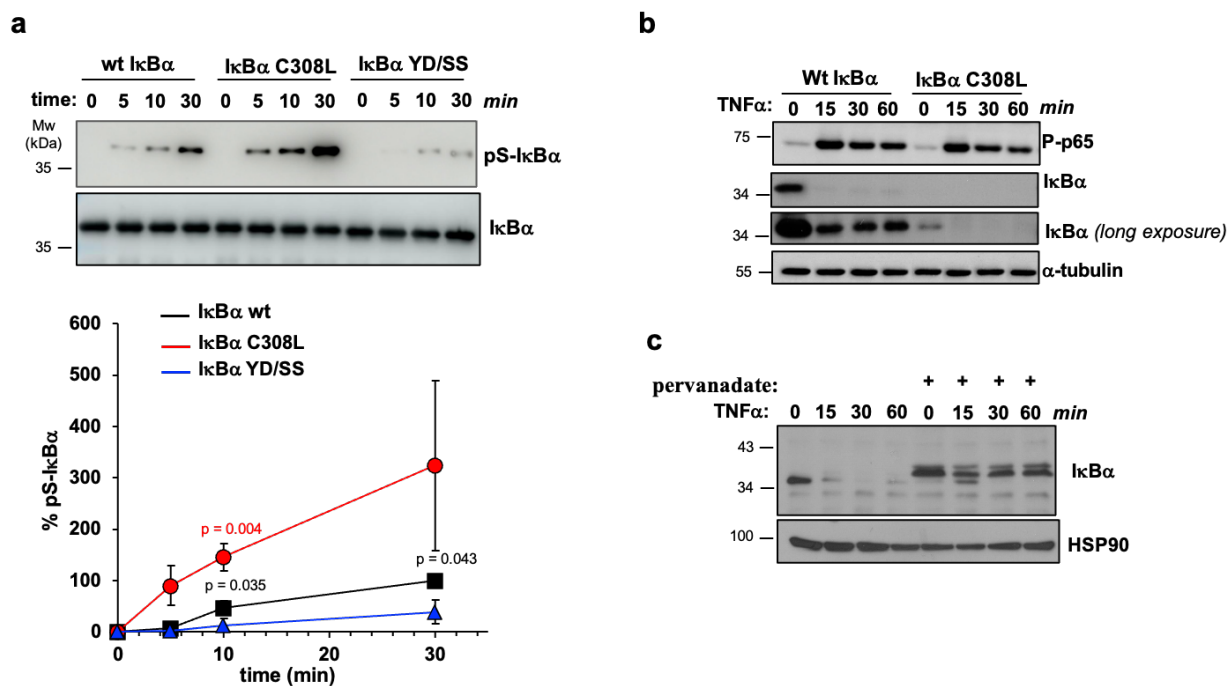

**Supplementary Fig. 2.** Activity and functional analyses. **a** *In vitro* kinase activity experiments using purified 6xHis-IKKβ(1-669) EE (0.5 nM) and full-length IκBα wild type (wt), C308L and YD/SS proteins (1 μM). Reaction samples were incubated at 30 °C, aliquots taken at the indicated times and analyzed by Western blotting using an antibody specific for Ser32/Ser36 phosphorylation of IκBα (pS-IκBα), and an anti-His antibody for 6xHis-IκBα detection. Samples were run onto two separate 10% SDS-PAGE gels for detection of total IκBα and pS-IκBα. (*Top panel*) Representative Western blot images. (*Lower panel*) Quantification of pS-IκBα levels normalized to IκBα at 30 min. The data (mean +/- SD) are averages of three independent kinase activity experiments. The indicated *P*-values (*p*) are obtained from a two-tailed unpaired *t*-test, *n* = 3 biological triplicates. Black: differences between IκBα YD/SS and IκBα wt; red: differences between IκBα C308L/F and IκBα YD/SS. **b** *In cellulo* degradation of IκBα C308L in MEFs KO for IκBα, IκBβ, IκBε. Wt IκBα is shown for comparison. See also legend of Fig. 3b of main text for experimental conditions. Note that IκBα C308L is only detectable at long exposures times, indicating low expression levels. **c** Western blot showing pervanadate inhibition of IκBα degradation. HEK293T cells were incubated or not with pervanadate (1 mM) for 30 minutes and stimulated with TNFα (10 ng/ml). Aliquots were taken at the indicated time points after TNFα stimulation. Source data are provided as a Source Data file. Original uncropped images are provided at the end of this file.

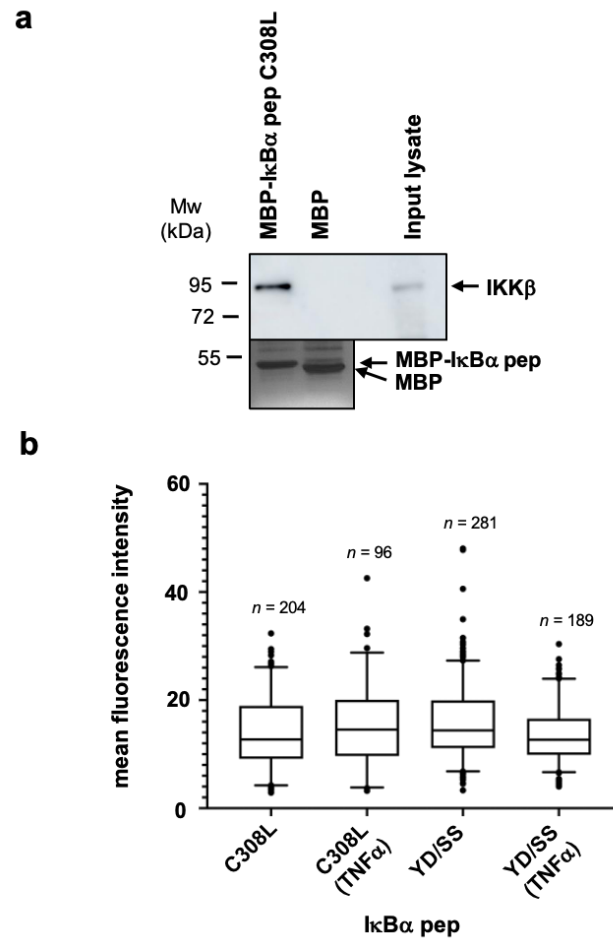

**Supplementary Fig. 3.** Inhibition of IKK activity by I $\kappa$ B $\alpha$  pep C308L. **a** Pull-down analysis of the interaction between the MBP-I $\kappa$ B $\alpha$  pep C308L peptide and endogenous IKK $\beta$ . MBP-I $\kappa$ B $\alpha$  pep C308L was expressed in *E. coli*, coupled to amylose resin and incubated with clarified extracts of HEK293T cells. Pull-down samples were migrated on two separate 10% SDS-PAGE gels. Endogenous IKK $\beta$  was detected by Western blotting using an anti-IKK $\beta$  antibody, whereas I $\kappa$ B $\alpha$  by Coomassie staining. MBP was used a negative control. This result was confirmed in a second independent pull-down experiment. **b** Mean fluorescence intensities of nuclear of mScarlet-E3-I $\kappa$ B $\alpha$  pep fusions in MRC5 cells for the four conditions of the experiment shown in Fig. 4c of the main text. The data are displayed in a box-and-whisker representation showing the median in the center line, the 75/25 percentiles at the boxes, the 5/95 percentiles at the whiskers and the extreme values to the minimum and maximum of the raw fluorescence data. *n*: number of cells analyzed. See also legend of Fig. 4b-c of the main text. Source data are provided as a Source Data file. Original uncropped images are provided at the end of this file.

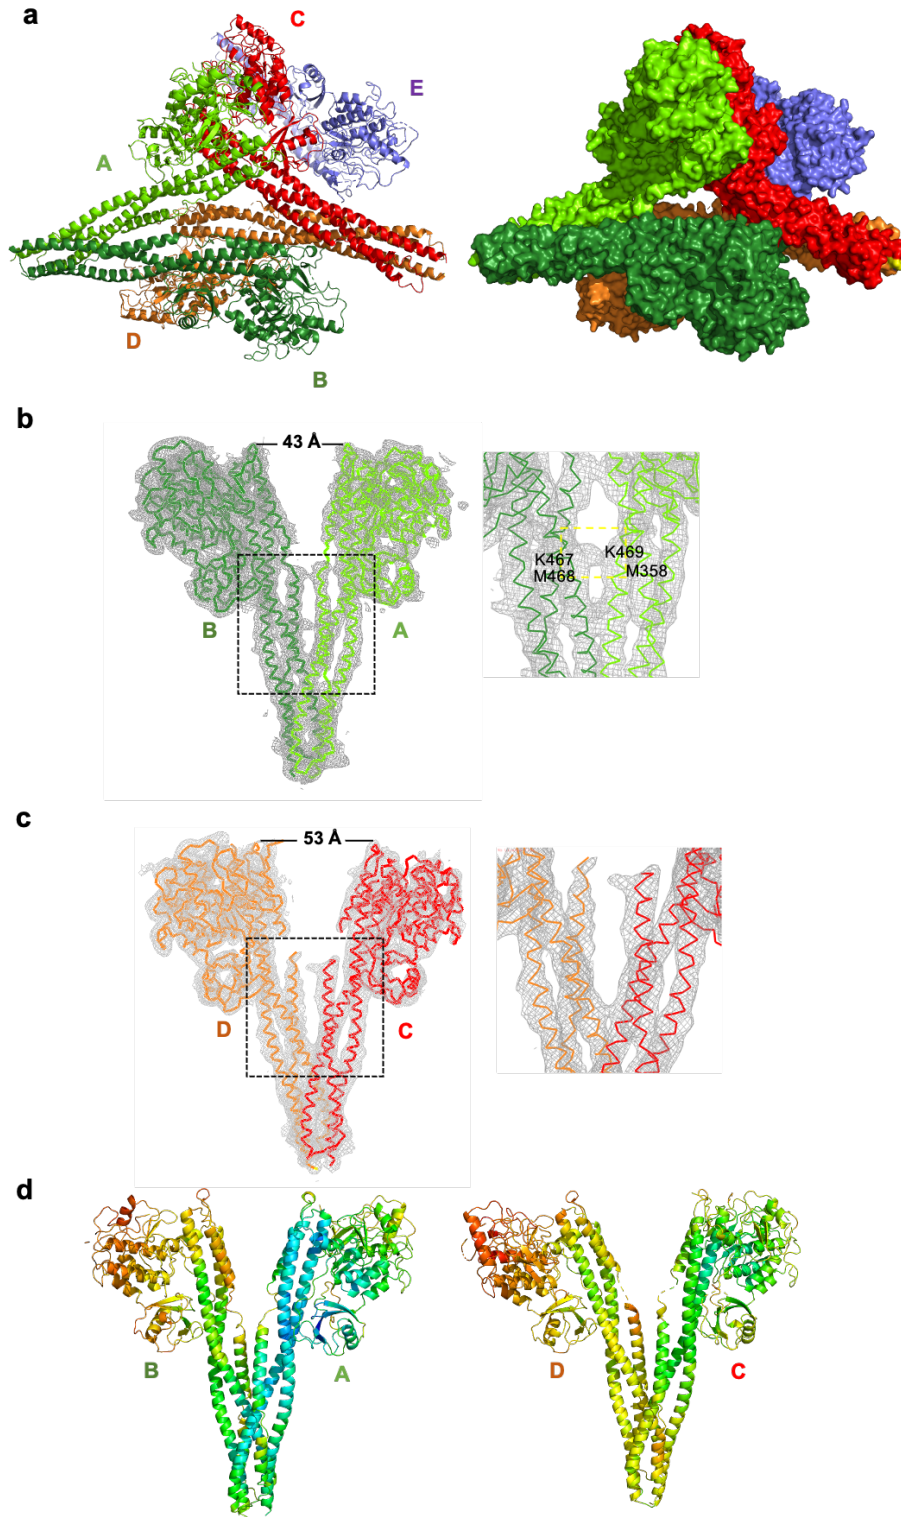

**Supplementary Fig. 4.** X-ray structure of the IKK $\beta$  homodimer. **a** The asymmetric unit of the crystal showing IKK $\beta$  protomers A-E in the ribbon (*left*) and surface (*right*) representations. A-B and C-D dimers stack onto each other through the V-shape and antiparallel interfaces described by *Polley et al.*<sup>12</sup>. Protomer E forms a homodimer with a molecule in the next unit

cell. **b-c** (*Left panels*) Molecular views showing the direct electron density map (plotted at  $1\sigma$ ) for dimers A-B and C-D. Boxes indicate the position of the right hand-side views. The distance between residues Asp580 in the dimer are reported ( $C\alpha-C\alpha$ ). The A-B Dimer displays a closed conformation as compared to the C-D dimer. (*Right panels*) Enlarged views of the region binding to the I $\kappa$ B $\alpha$  pep according to the CLMS data. Yellow dashed lines: lobe of extra electron density in the proximity of K469 of the A-B dimer. This lobe is not visible in the C-D dimer. **d** Crystallographic average B-factors displayed on structures of the A-B (*left panel*) and C-D (*right panel*) homodimers with color code ranging from blue (low B-factor) to red (high B-factor).

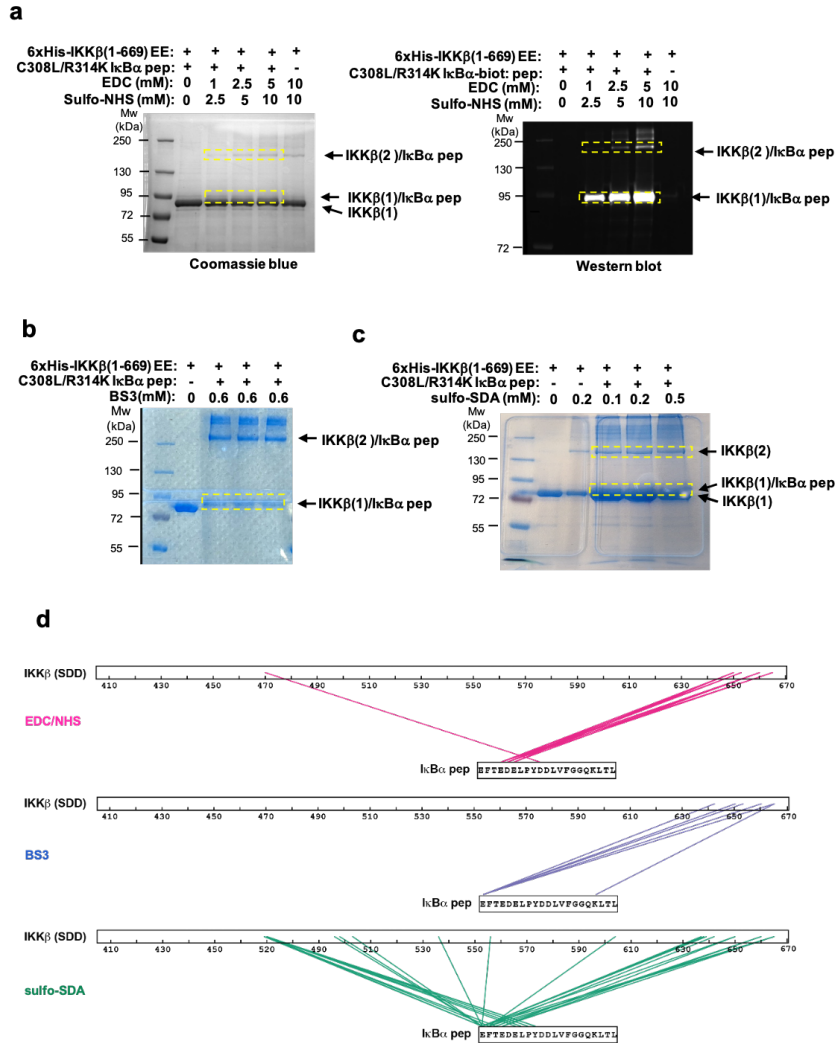

**Supplementary Fig. 5.** Cross-linking of the IKK $\beta$ /I $\kappa$ B $\alpha$  pep complex. Purified 6xHis-IKK $\beta$ (1-699) EE protein was mixed to a 10-fold excess of the synthetic C308L/R314K I $\kappa$ B $\alpha$  pep. After cross-linking samples were migrated on an 8% SDS-PAGE gel. Yellow dashed lines indicate protein bands analyzed by MS, consisting of either a monomer of IKK $\beta$  (IKK $\beta$ (1)) or a cross-linked dimer of IKK $\beta$  (IKK $\beta$ (2)), in both cases conjugated to I $\kappa$ B $\alpha$  pep. **a** Cross-linking with EDC/sulfo-NHS at the indicated concentrations. (*Left panel*) Coomassie stained gel. (*Right panel*) Western blot analysis using the biotinylated peptide variant (C308L/R314K I $\kappa$ B $\alpha$ -biot pep) and streptavidin conjugated with Alexa Fluor<sup>TM</sup> 680 for evaluation of cross-linking efficiency. **b-c** Cross-linking with BS3 and sulfo-SDA at the indicated concentrations (Coomassie stained gels). **d** IKK $\beta$ -peptide cross-links identified by MS analysis in conditions of EDC/sulfo-NHS (*upper panel*, magenta lines), BS3 (*middle panel*, purple lines) and sulfo-SDA (*lower panel*, green lines). All the links identified map to the SDD domain of IKK $\beta$  (residues 410-667).

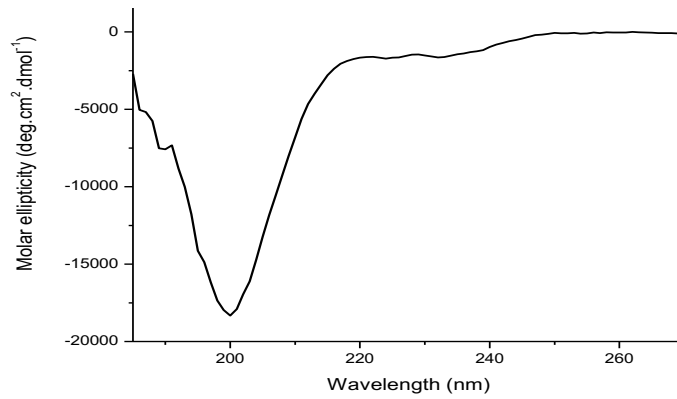

**Supplementary Fig. 6.** Far UV circular dichroism spectrum of synthetic peptide I $\kappa$ B $\alpha$  pep. The spectrum was acquired at T=25 °C using a Jasco J-815 instrument. The peptide (I $\kappa$ B $\alpha$  pep C308L at 1.25 mM concentration) was resuspended in 20 mM Hepes pH 8.0. The spectrum is consistent with the following contribution: 5%  $\alpha$ -helix, 11,3 %  $\beta$ -sheet, 9.3 % turn and 74.2 % random coil.



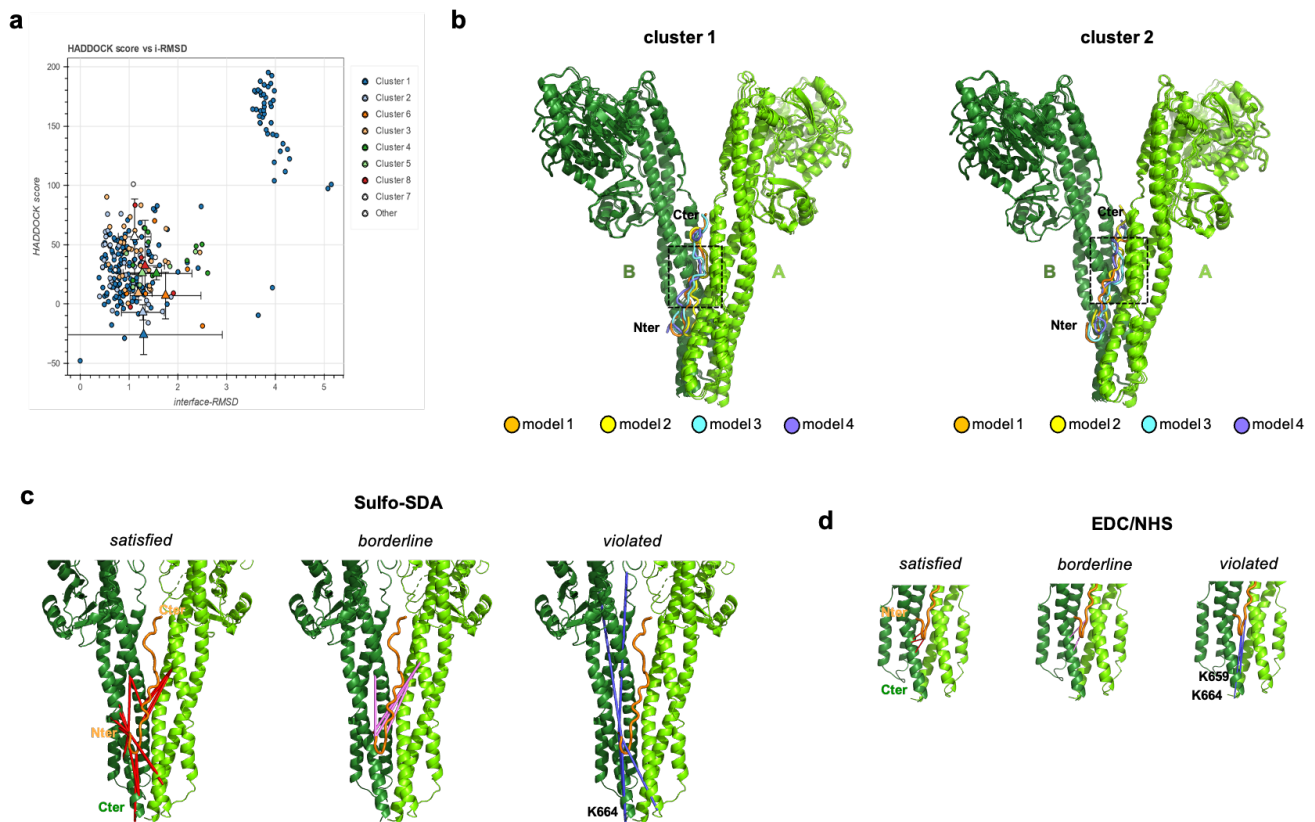

**Supplementary Fig. 7.** Integrative modelling of the IKK $\beta$ / I $\kappa$ B $\alpha$  pep complex using x-ray diffraction and CLMS data. **a** Score convergence for the accepted clusters. The HADDOCK score plotted as a function of interface root-mean-square-deviation (RMSD) with a cutoff of 5 Å. Circles: individual structures; triangles: cluster averages. Error bars: SD values. The mean within-cluster interface RMSD of the best scoring cluster (cluster 1) is 1.3 Å. **b** Structural alignment of the four best scoring models for the two best scoring clusters (cluster 1 and cluster 2). The IKK $\beta$ /I $\kappa$ B $\alpha$  pep complexes are oriented and colored as in Fig. 5a except for the peptide backbone, which is color coded for the different models are indicated. The hatched box marks the position of the YDD $\Phi$ x $\Phi$  motif. **c-d** Unique CLMS distance restraints used for the docking calculations mapped on the final model. **c** Sulfo-SDA derived restraints. Red lines: satisfied links with a C $\beta$ -C $\beta$  distance  $\leq$  22.5 Å; pink lines: borderline links with a C $\beta$ -C $\beta$  distance 22.5 - 27.5 Å; purple lines: violated links with C $\beta$ -C $\beta$  distance  $>$  22.5 Å. **d** EDC/sulfo-NHS derived restraints. Red lines: satisfied links with a C $\beta$ -C $\beta$  distance  $\leq$  7.0 Å; pink lines: borderline links with a C $\beta$ -C $\beta$  distance 7.0 - 9.5 Å; purple lines: violated links with C $\beta$ -C $\beta$  distance  $>$  9.5 Å.

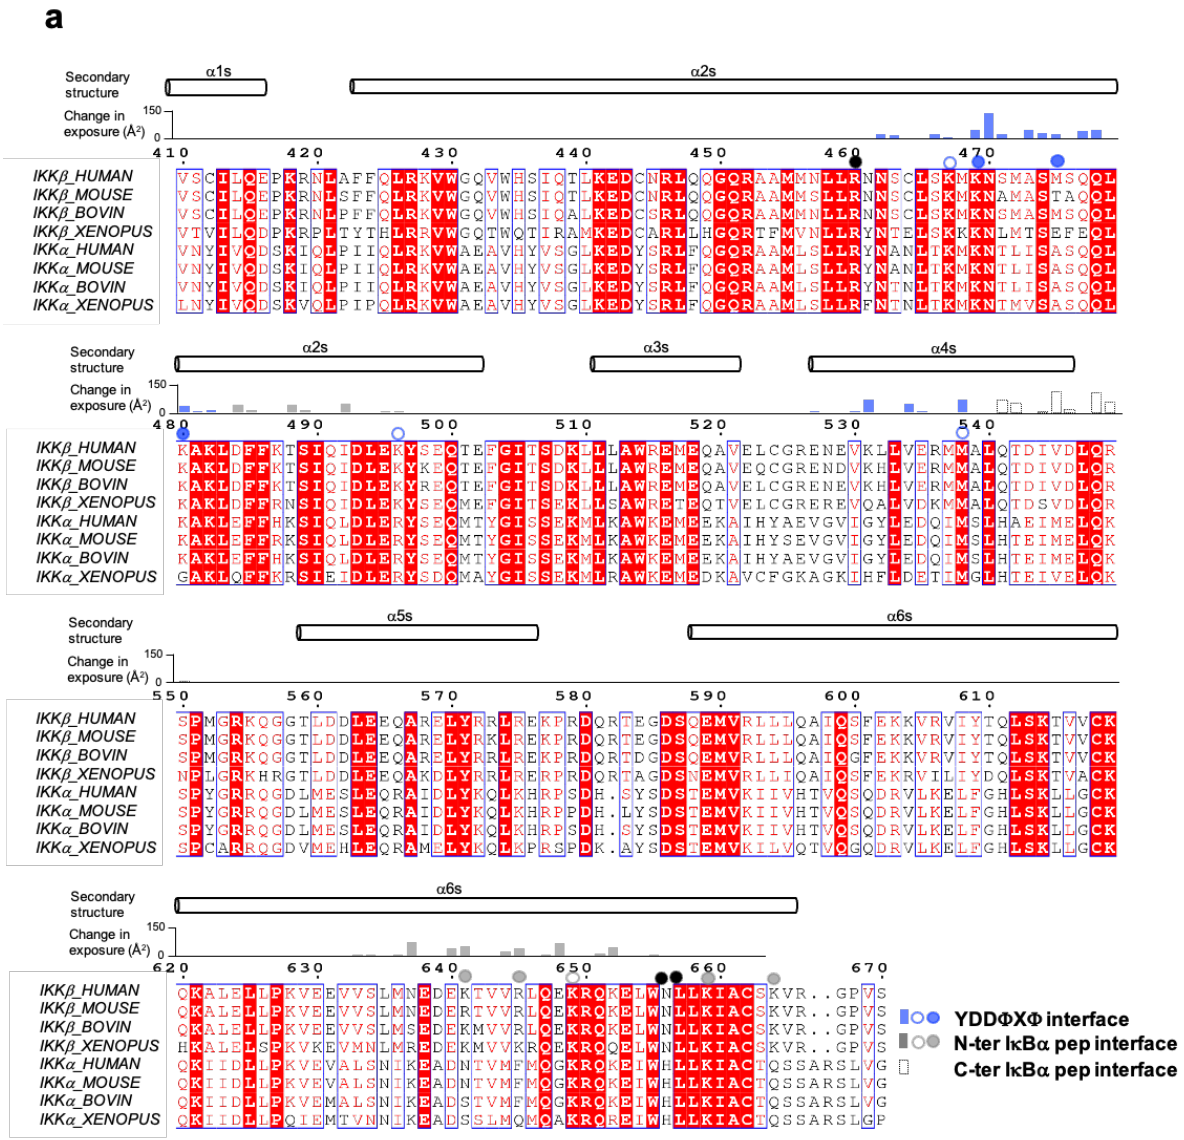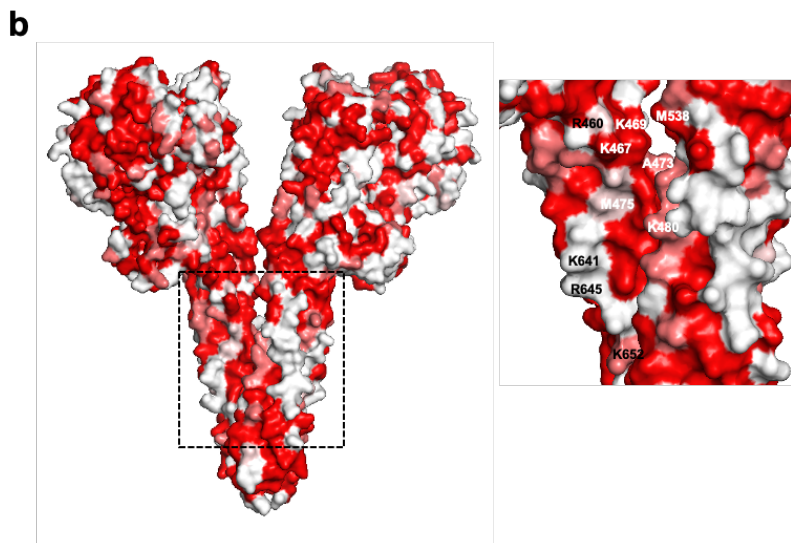

**Supplementary Fig. 8.** Residue conservation within the YDD $\Phi$ x $\Phi$  binding groove. **a** Sequence alignment of the SDD domains of IKK $\beta$  and IKK $\alpha$  proteins (residues 410-664). Residue

numbering on top of the alignment refers to the human IKK $\beta$  protein. The histogram on top of the alignment reports on the burial of residues at the interface with I $\kappa$ B $\alpha$  pep. The “change of exposure” value corresponds to the change in the solvent accessible surface (SASA) in the presence or absence of the peptide. SASA values were calculated using PyMOL and were summed over protomers A and B. Circles indicate residues mutated in this study. Filled circles: mutations decreasing binding to I $\kappa$ B $\alpha$ . Open circles: mutations having no impact on I $\kappa$ B $\alpha$  binding (see also Supplementary Fig. 9b). Purple histograms/circles: residues contacting the YDD $\Phi$ x $\Phi$  motif; gray histograms/circles: residues contacting the N-terminal region of I $\kappa$ B $\alpha$  pep; white hatched histograms: residues contacting the C-terminal region of I $\kappa$ B $\alpha$  pep, which is poorly defined in the different models of cluster 1 due to lack of CLMS restraints (see Supplementary Fig. 5c); black circles: other residues. **c** (*Left panel*) Residue conservation mapped on the IKK $\beta$  homodimer. The dashed box marks the I $\kappa$ B $\alpha$  pep binding region reported in the right panel. Red: absolute conservation; salmon: conservation of amino acid physico-chemical properties; light pink: partial conservation. (*Right panel*) View of the YDD $\Phi$ x $\Phi$  binding groove. Molecular views in the left and right panel are shown in the same orientations as in Fig. 5 of the main text.

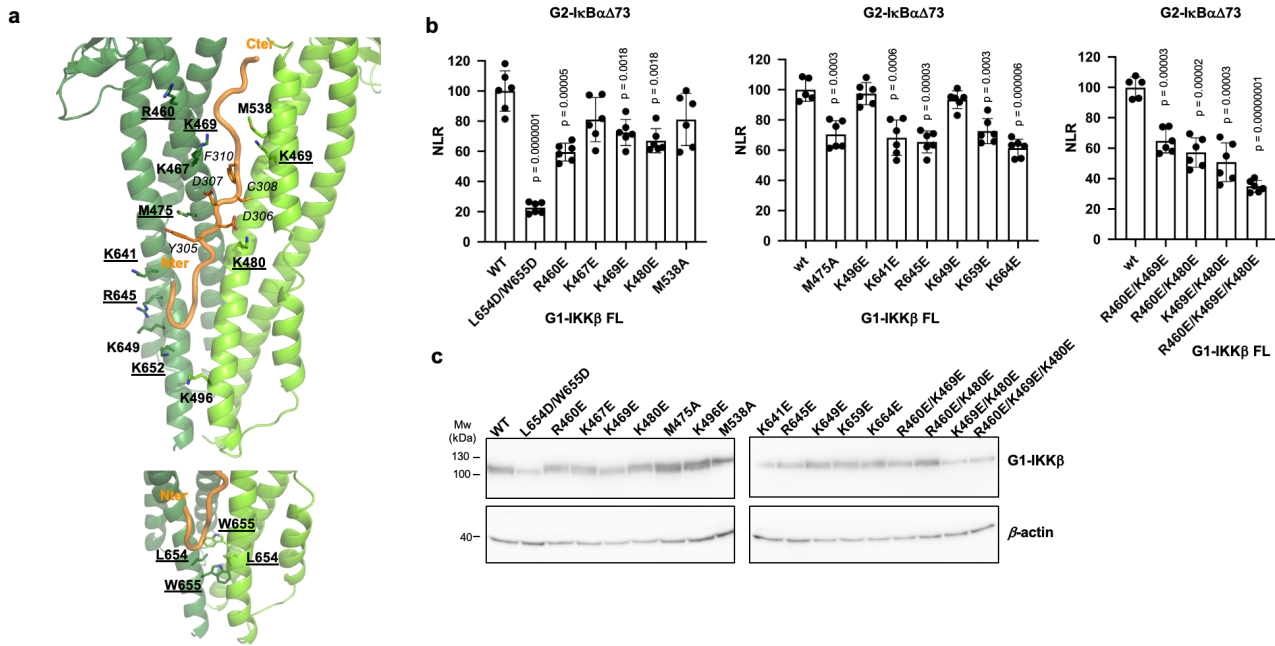

**Supplementary Fig. 9.** Mutagenesis of IKK $\beta$  residues at the I $\kappa$ B $\alpha$  pep and dimer interfaces. **a** Views of the IKK $\beta$ /I $\kappa$ B $\alpha$  pep interface (*upper panel*) and IKK $\beta$  dimerization (*lower panel*) regions of the complex. The side chains of mutated residues of IKK $\beta$  are displayed (black bold labels). Residues whose mutagenesis leads to decreased binding are indicated (underlined labels). **b** GPCA analysis of the interactions between mutants of full-length IKK $\beta$  and I $\kappa$ B $\alpha$  $\Delta$ 73 fused to the G1 and G2 fragments of the luciferase, respectively. For each interaction data (mean  $\pm$  SD) are derived from two GPCA datasets, with each dataset comprising three independent transfection experiments of the same interaction. The data are normalized to the average value of the wt IKK $\beta$ /I $\kappa$ B $\alpha$  $\Delta$ 73 interaction in each dataset. *P*-values (*p*) are derived using a two-tailed unpaired *t*-test, *n* = 6 biological replicates and report on the differences with the wt IKK $\beta$ /I $\kappa$ B $\alpha$  $\Delta$ 73 interaction. **c** Western blot analysis of the expression levels of G1- IKK $\beta$  mutants in HEK293T cells. See also legend of Fig. 1c of the main text. Source data are provided as a Source Data file. Original uncropped images are provided at the end of this file.

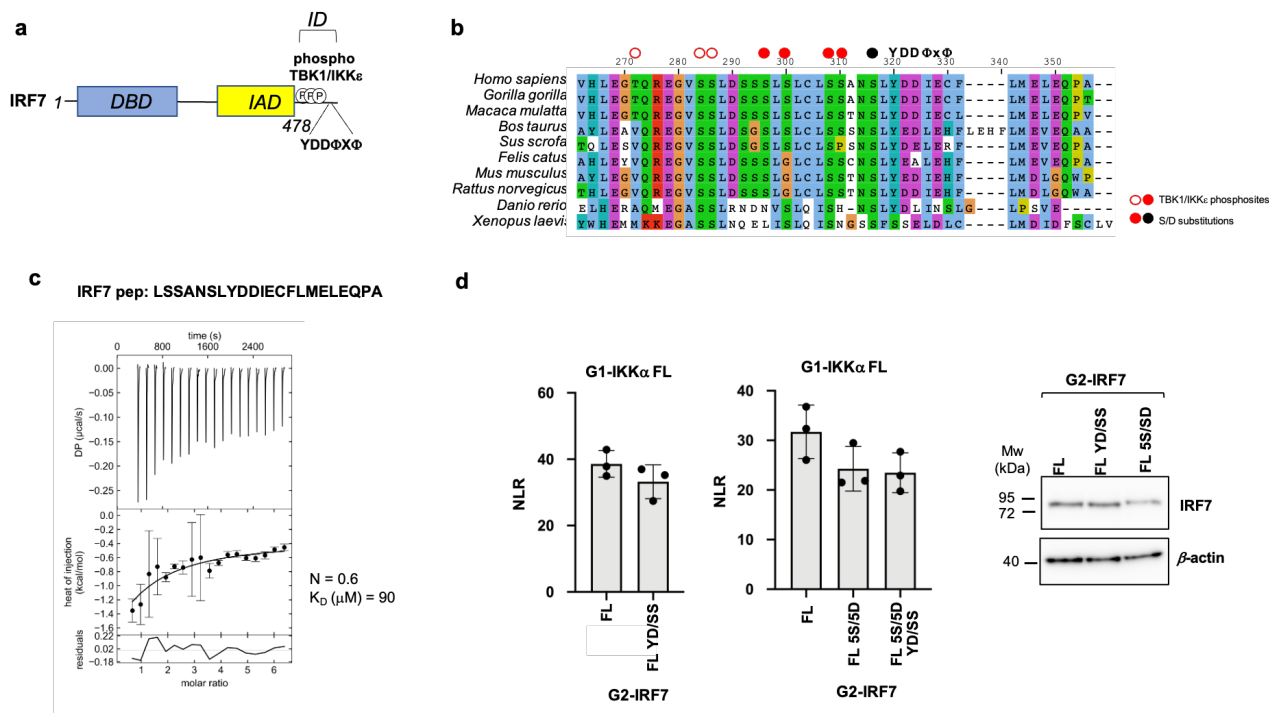

**Supplementary Fig. 10.** Interaction between IKK $\alpha$  and IRF7. **a** Schematic representation of IRF7 domain architecture. DBD: DNA binding domain (residues 10-127); IAD: IRF association domain (residues 237-423); disordered C-terminal region containing the the YDD $\Phi$ x $\Phi$  motif and adjacent TBK1/IKK $\epsilon$  phosphorylation cluster. **b** Sequence alignment of the IRF7 C-terminal region (residues 458-503). Ser/Thr residues targeted by TBK1/IKK $\epsilon$  according to Caillaud *et al.*<sup>36</sup> and tenOever *et al.*<sup>37</sup> are indicated by red circles. The YDD $\Phi$ x $\Phi$  motif is indicated in bold. Residues substituted with aspartic acid in the IRF7 5S/5D construct are indicated by filled circles. **c** ITC binding isotherm for the IKK $\alpha$ /IRF7 pep interaction, characterized by low affinity and weakly exothermic binding. A global fit based on two independent datasets was attempted but due to high experimental error it did not converge. Error bars correspond to the RMSD of the fitted curve and experimental values. The tentative estimate of the binding constant is indicated on the right-hand side. **d** (Left and middle panels) Representative GPCA datasets of the interactions between full-length wt G1-IKK $\alpha$  and G2-IRF7 constructs. G2-IRF7 FL YD/SS: G2-IRF7 FL Y502S/D504S; G2-IRF7 FL 5S/5D: G2-IRF7 FL S477D/S479D/S483D/S484D/S487D; G2-IRF7 FL 5S/5D YD/SS: G2-IRF7 FL S477D/S479D/S483D/S484D/S487D/Y502S/D504S. (Right panel) Expression levels of G2-IRF7 proteins in HEK293T cells. See also legend of Fig. 1c of the main text. Source data are provided as a Source Data file. Original uncropped images are provided at the end of this file.

**a**

|                         |                                       |
|-------------------------|---------------------------------------|
| <b>IκBα</b> (297-317)   | EFTFDEL <b>YDDC</b> VFGGQRLTL         |
| <b>DDX3X</b> (155-174)  | NTGI NFEKY <b>DD</b> I PVEATGNN       |
| <b>PSMF1</b> (257-271)  | NPDH LPPPG <b>YDDMYL</b>              |
| <b>FYB2</b> (579-599)   | LKSQEV <b>I</b> <b>YDDVDL</b> SEKESKD |
| <b>SCIMP</b> (123-143)  | SY I EPED <b>YDDVE</b> I PANTEKA      |
| <b>BANK1</b> (476-495)  | GSESE <b>DDYDDLY</b> VFI PGAD         |
| <b>MAP4K1</b> (373-393) | LSESS <b>DDYDDVD</b> I PTPAEDT        |
| <b>LIMD1</b> (1-16)     | MDKY <b>DDL</b> G LEASKFI E           |

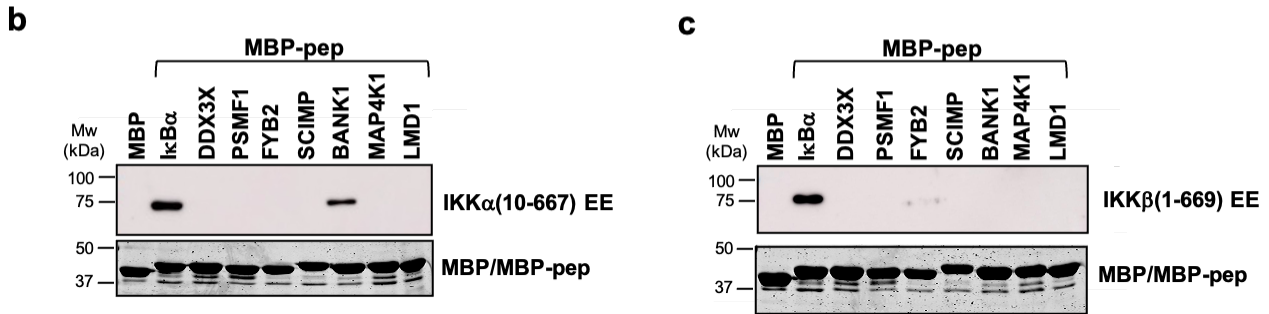

**Supplementary Fig. 11.** IKK $\alpha$  and IKK $\beta$  binding to YDD $\Phi$ x $\Phi$  motif peptides derived from proteins identified using SLIMSearch<sup>35</sup>. **a** Motif peptide sequences from *human* DDX3X, PSMF1, FYB2, SCIMP, BANK1, MAP4K1 and LIMD1 proteins used in the pulldown experiments shown in (b). **b** Pulldown analyses of the interactions between recombinant 6xHis-IKK $\alpha$ (10-667) EE (*left panel*) or 6xHis-IKK $\beta$ (1-669) EE (*right panel*) proteins and MBP-peptide fusions. IKK $\alpha$  and IKK $\beta$  were detected by Western blot (anti-His antibody) and MBP-peptides by Coomassie staining. These results were reproduced in a second independent experiment. See also legend of Fig. 1b. Original uncropped images are provided at the end of this file.

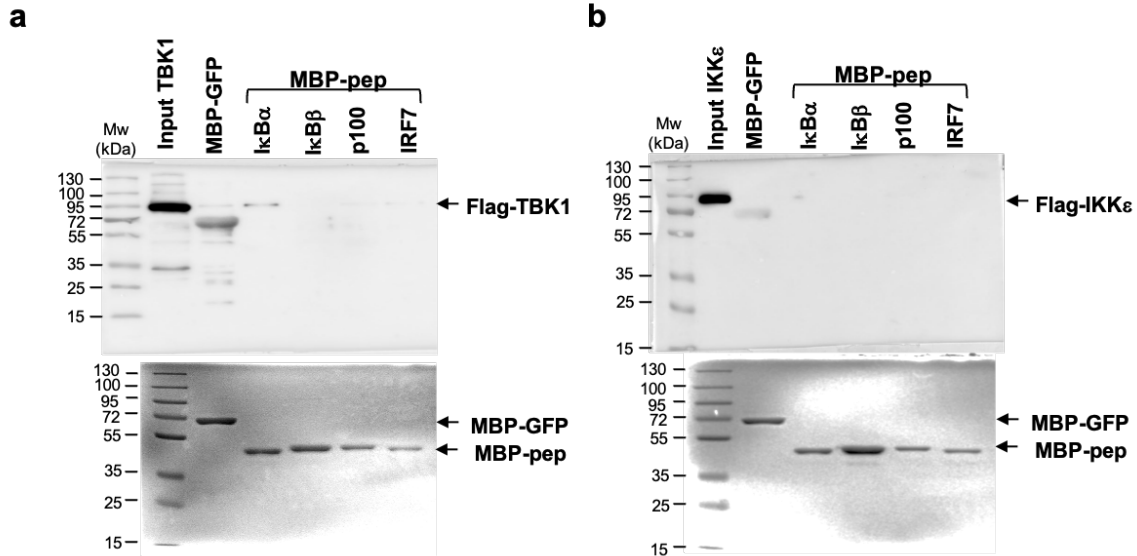

**Supplementary Fig. 12.** Pulldown analyses of TBK1 (a) or IKKε (b) and YDDΦxΦ motif peptides from IκBα, IκBβ, p100 and IRF7. Cleared cellular lysates of HEK23T overexpressing Flag-TBK1 or Flag-IKKε proteins were incubated with MBP-YDDΦxΦ peptides coupled to amylose resin. Pulldown samples were processed as described in the Methods section. TBK1 and IKKε were detected by Western blot (anti-Flag antibody) and MBP-peptides and negative control MBP-GFP by Coomassie staining. These results were confirmed with a second independent experiment. See also legend of Fig. 6b.

---

**8OMV**

---

**Data collection**

|                                     |                            |
|-------------------------------------|----------------------------|
| Source                              | Proxima 2A, SOLEIL         |
| Detector                            | Dectris EIGER X 9M         |
| Wavelength (Å)                      | 0.98                       |
| Temperature (K)                     | 100                        |
| Resolution range (Å)                | 63.25 - 4.16 (4.31 - 4.16) |
| Space group                         | C 1 2 1                    |
| Unit cell                           |                            |
| <i>a, b, c</i> (Å)                  | 226.29, 136.80, 204.36     |
| <i>α, β, γ</i> (°)                  | 90, 91.453, 90             |
| Total reflections                   | 329672 (32729)             |
| Unique reflections                  | 46834 (93)                 |
| Multiplicity                        | 7.0 (7.1)                  |
| Completeness (%)                    | 43.62 (2.02)               |
| { <i>I</i> / <i>σ</i> ( <i>I</i> )} | 3.71 (0.11)                |
| Wilson B-factor (Å <sup>2</sup> )   | 154.8                      |
| R <sub>merge</sub>                  | 0.2766 (12.62)             |
| R <sub>meas</sub>                   | 0.2996 (13.61)             |
| R <sub>pim</sub>                    | 0.1137 (5.059)             |
| CC <sub>1/2</sub>                   | 0.993 (-0.0095)            |
| CC*                                 | 0.998 (-0.138)             |

---

**Anisotropic truncation**

|                                                     |                                                                        |
|-----------------------------------------------------|------------------------------------------------------------------------|
| Ellipsoidal resolution (Å) (direction)              | 3.98 (0.973 a* - 0.229 c*)<br>6.81 (b*)<br>5.532 (0.254 a* + 0.967 c*) |
| Best / worst diffraction limits (Å)                 | 4.16 (4.42 – 4.16) / 7.52                                              |
| Unique reflections (ellipsoidal)                    | 20490 (1025)                                                           |
| Mean <i>I</i> / <i>σ</i> ( <i>I</i> ) (ellipsoidal) | 7.5 (1.2)                                                              |
| R <sub>meas</sub> (ellipsoidal)                     | 0.206 (2.731)                                                          |
| R <sub>pim</sub> (ellipsoidal)                      | 0.079 (1.070)                                                          |
| CC/2 (ellipsoidal)                                  | 0.980 (0.244)                                                          |
| Ellipsoidal completeness (%)                        | 88.1 (61.8)                                                            |

---

**Refinement**

|                                        |               |
|----------------------------------------|---------------|
| Reflections used in refinement         | 20489 (351)   |
| Reflections used for R <sub>free</sub> | 1018 (11)     |
| R <sub>work</sub>                      | 0.257 (0.348) |
| R <sub>free</sub>                      | 0.299 (0.416) |
| CC(work)                               | 0.857 (0.365) |
| CC(free)                               | 0.809 (0.554) |
| Number of non-hydrogen atoms           | 25125         |
| macromolecules                         | 25125         |
| ligands                                | 0             |
| solvent                                | 0             |



|                                    |       |
|------------------------------------|-------|
| Protein residues                   | 3111  |
| RMSD bond lengths (Å)              | 0.002 |
| RMSD bond angles (°)               |       |
| Ramachandran plot                  | 0.57  |
| Favoured regions (%)               | 95.62 |
| Additionally allowed regions (%)   | 4.28  |
| Outlier regions (%)                | 0.1   |
| Rotamer outliers (%)               | 0     |
| Clashscore                         | 8.92  |
| Average B-factor (Å <sup>2</sup> ) | 304   |
| macromolecules                     | 304   |

---

**Supplementary Table 1.** X-ray data collection and refinement statistics. Values in parentheses are for the highest resolution shell.

**Original gel images for Supplementary Figures**

# Supplementary Figure 1

**a**

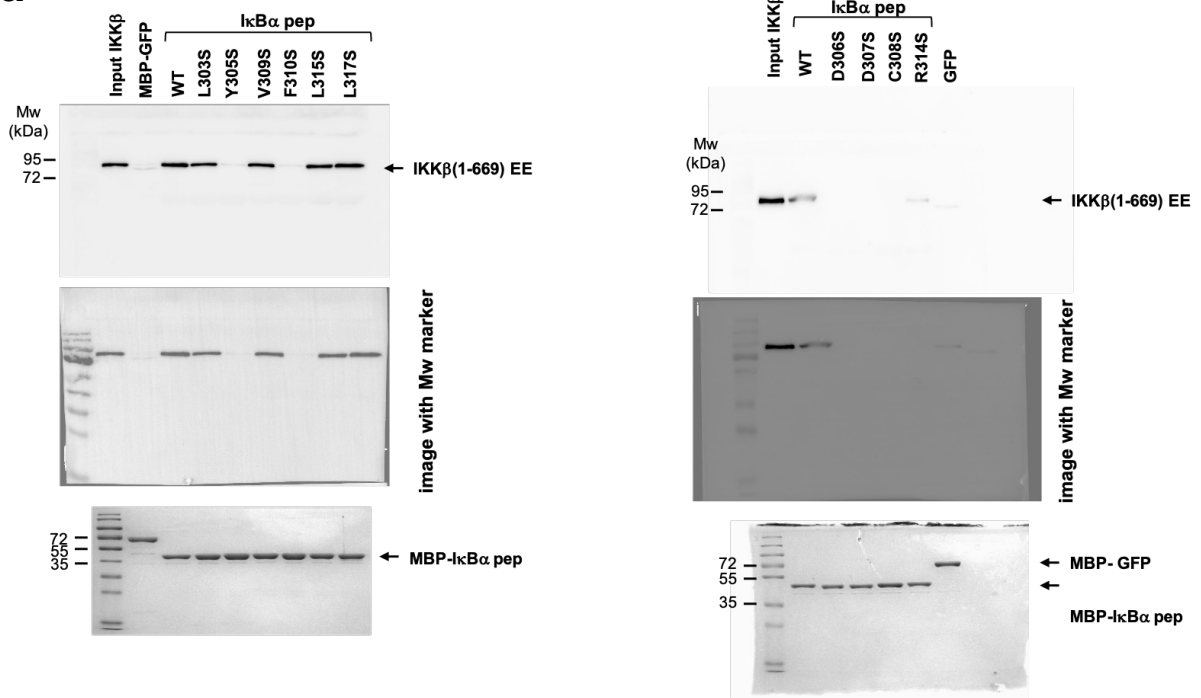

**b**

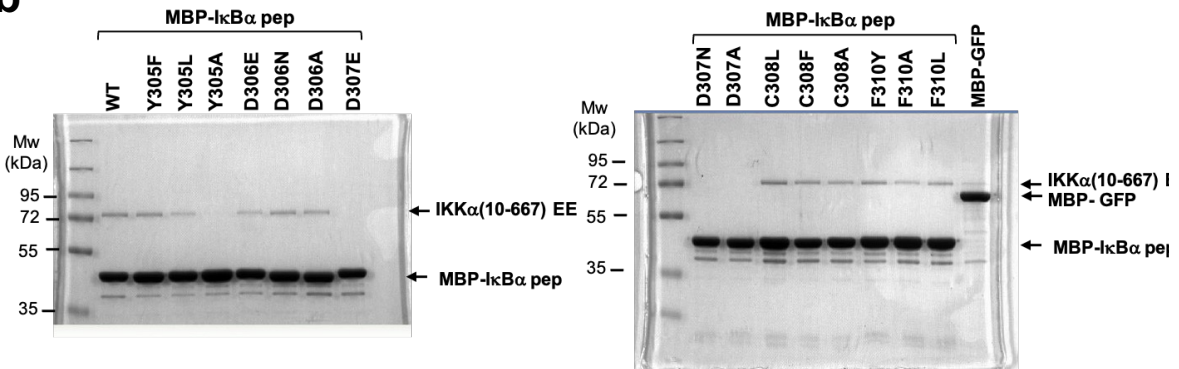

**c**

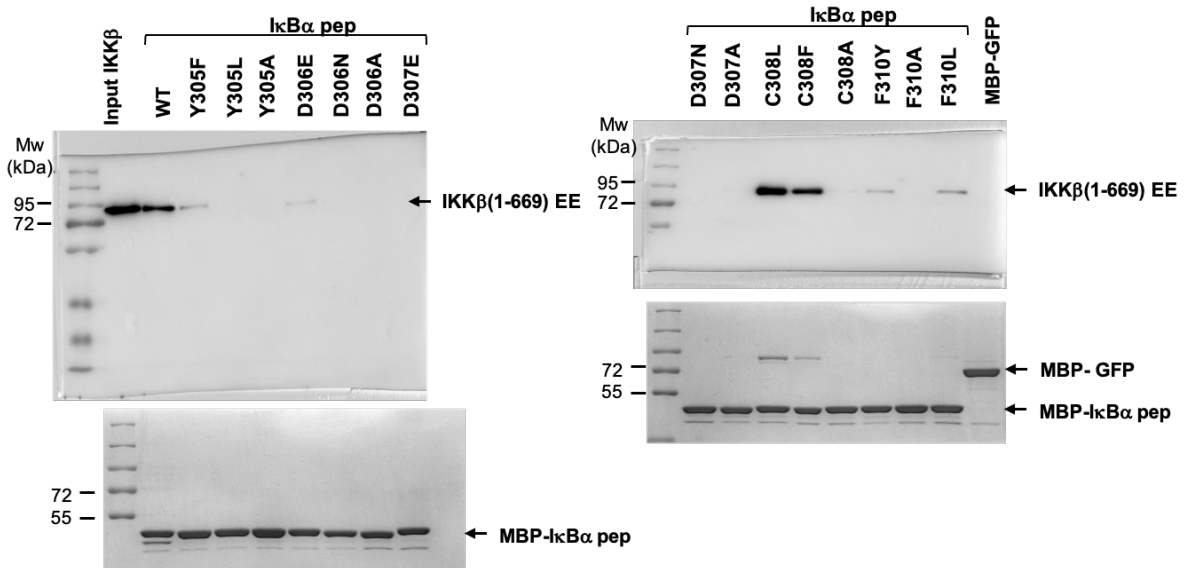

# Supplementary Figure 2

**a**

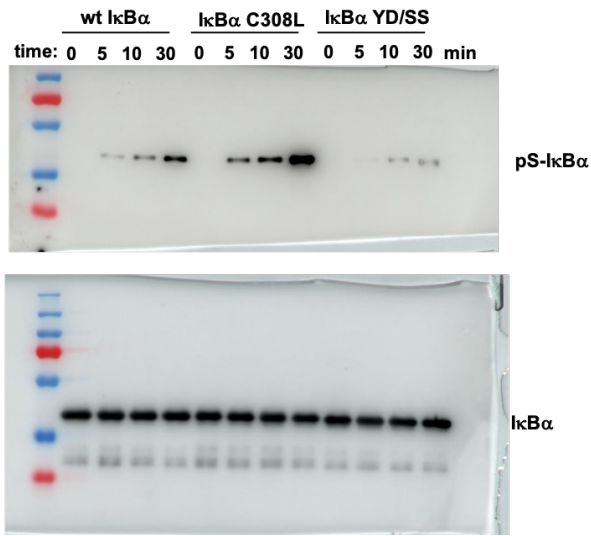

**b**

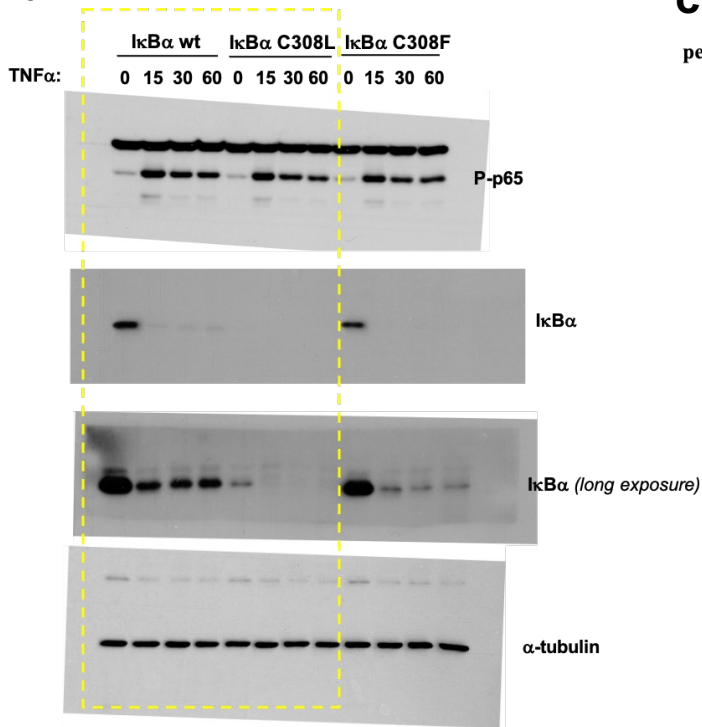

**c**

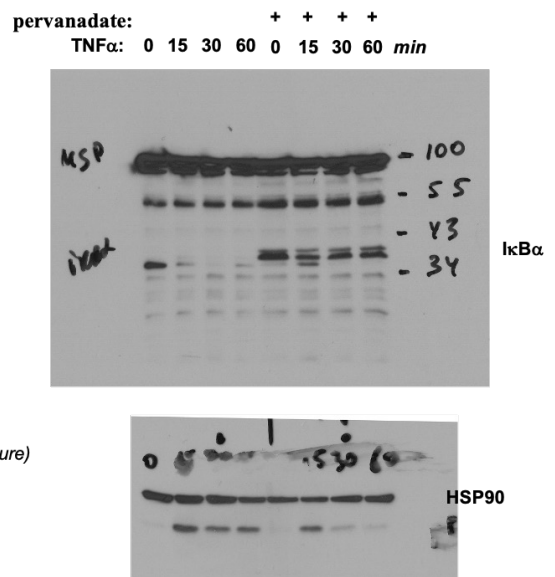

Yellow dashed line box: area of the gel shown in the article

# Supplementary Figure 3

**a**

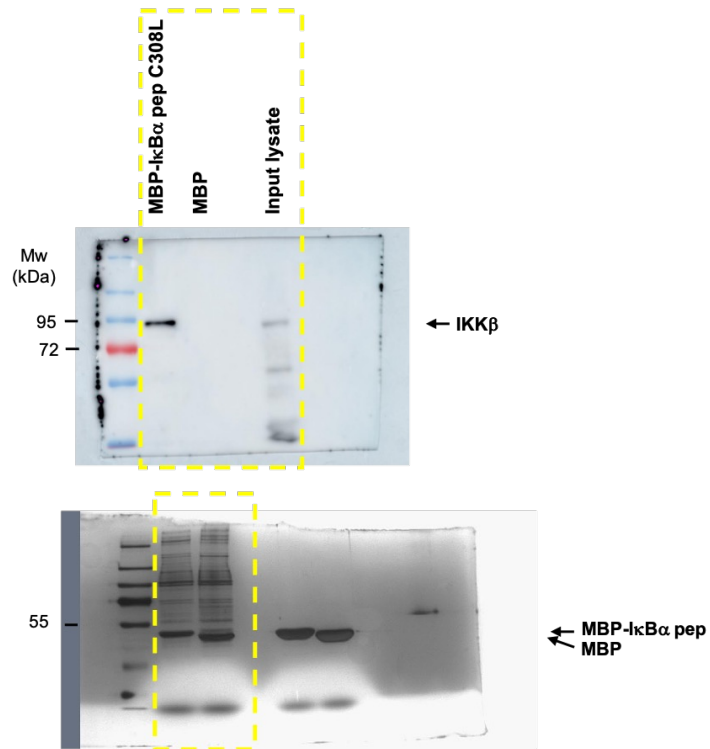

*Yellow dashed line box: area of the gel shown in the article*

# Supplementary Figure 9

C

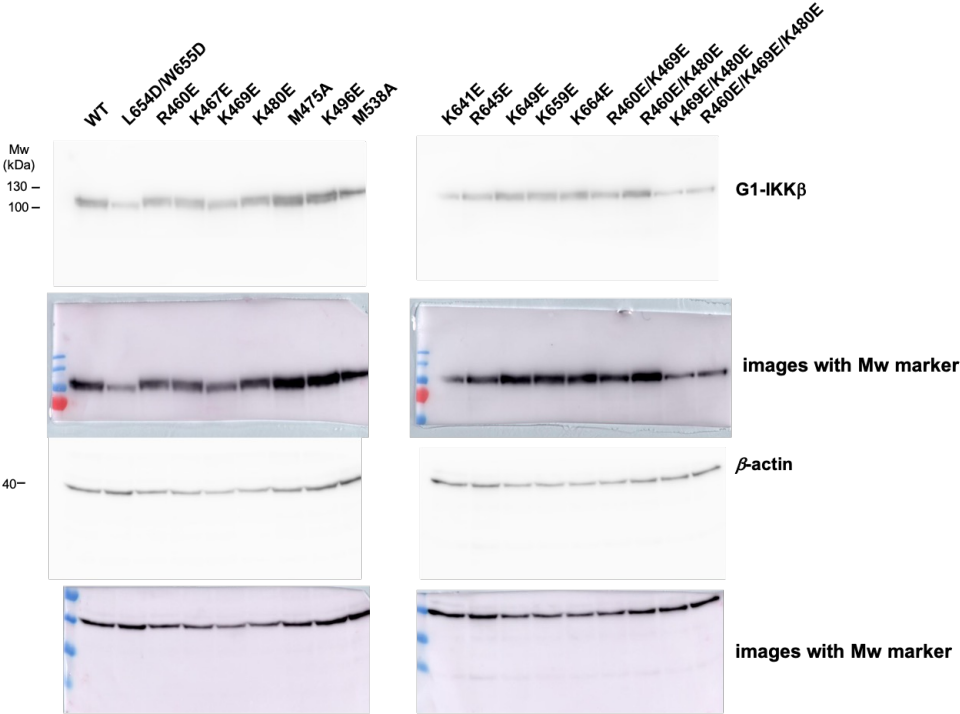

# Supplementary Figure 10

**d**

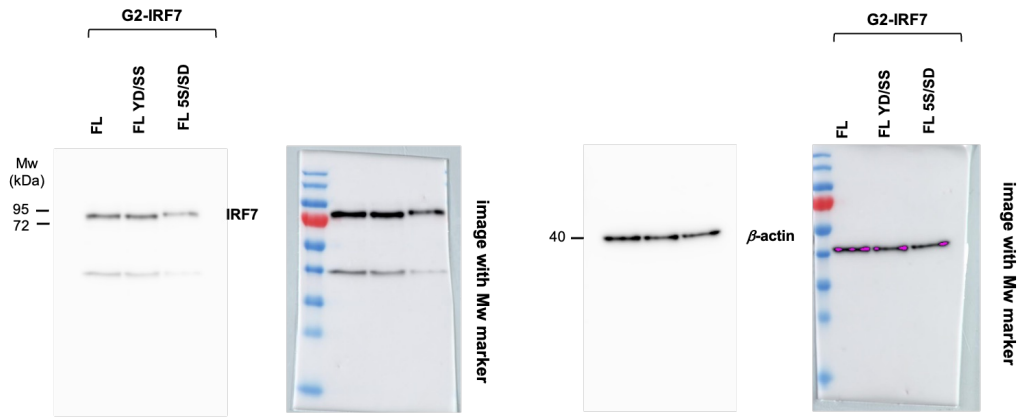

# Supplementary Figure 11

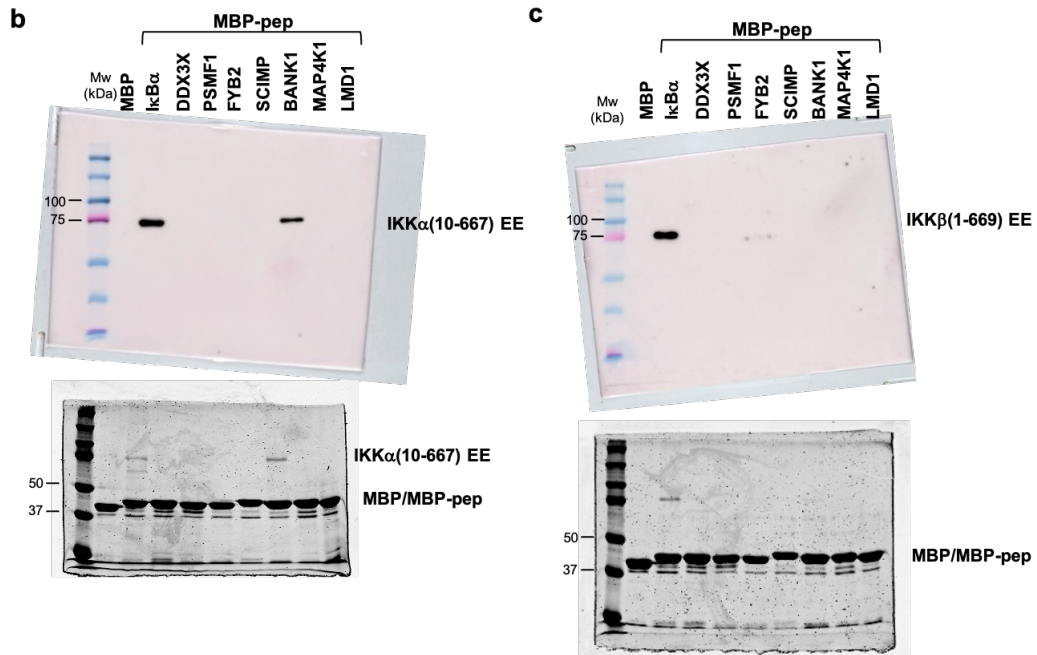

Supplement: 41467_2024_52076_MOESM1_ESM.pdf [file 41467_2024_52076_MOESM1_ESM.pdf]
